# Supplementary material
Source: PubMed Central journal article supplement (PMC2575129)

## SUPPLEMENTARY TABLES AND FIGURES

The Complete Genome Sequence of *Moorella thermoacetica* (f. *Clostridium thermoaceticum*)

Elizabeth Pierce<sup>1</sup>, Gary Xie<sup>2,3</sup>, Ravi D. Barabote<sup>2,3</sup>, Elizabeth Saunders<sup>2,3</sup>, Cliff S. Han<sup>2,3</sup>, John C. Detter<sup>2,3</sup>, Paul Richardson<sup>2,4</sup>, Thomas S. Brettin<sup>2,3</sup>, Amaresh Das<sup>5</sup>, Lars G. Ljungdahl<sup>5</sup>, and Stephen W. Ragsdale<sup>1</sup>

<sup>1</sup>*Department of Biological Chemistry, University of Michigan, Ann Arbor, Michigan;* <sup>2</sup>*Los Alamos National Laboratory, Bioscience Division, Los Alamos, New Mexico;* <sup>3</sup>*Department of Energy Joint Genome Institute, Walnut Creek, CA;* <sup>4</sup>*Lawrence Berkeley National Laboratory, Berkeley, CA;* <sup>5</sup>*Department of Biochemistry and Molecular Biology, University of Georgia*

**Supplementary Table 1. Pseudogenes found in the *M. thermoacetica* genome.**

| Locus Tag | Product Name                                                 | AA Seq Length | Remnants                                    | Redundance  |
|-----------|--------------------------------------------------------------|---------------|---------------------------------------------|-------------|
| Moth_0037 | FAD/FMN-containing dehydrogenases                            | 462           | early stop codon, frameshift                | 2 paralogs  |
| Moth_0138 | purine-cytosine permease and related proteins                | 417           | early stop codon                            | no paralog  |
| Moth_0164 | dTDP-4-dehydrorhamnose reductase                             | 283           | fragment, frameshift                        | 2 paralogs  |
| Moth_0166 | glucose-1-phosphate thymidyltransferase                      | 227           | deletion in central region                  | no paralog  |
| Moth_0180 | helicase                                                     | 77            | C-terminal fragment                         | no paralog  |
| Moth_0276 | putative resolvase                                           | 484           | N-terminal fragment                         | 1 paralog   |
| Moth_0410 | response regulator receiver                                  | 45            | N-terminal fragment                         | 2 paralogs  |
| Moth_0411 | GGDEF                                                        | 181           | C-terminal fragment                         | 7 paralogs  |
| Moth_0413 | phage integrase                                              | 97            | fragment                                    | 1 paralog   |
| Moth_0472 | ATPase, E1-E2 type                                           | 351           | C terminal left                             | 1 paralog   |
| Moth_0627 | reverse transcriptase                                        | 97            | C-terminal fragment                         | 1 paralog   |
| Moth_0634 | Nucleotidyltransferase/DNA polymerase involved in DNA repair | 41            | C-terminal fragment                         | 1 paralog   |
| Moth_0659 | dTDP-glucose pyrophosphorylase                               | 67            | N-terminal fragment                         | no paralog  |
| Moth_0661 | daunorubicin resistance ABC transporter ATP-binding subunit  | 256           | central region fragment                     | 2 paralogs  |
| Moth_0667 | Phosphoglucomutase/ phosphomannomutase C terminal            | 146           | C-terminal fragment                         | no paralog  |
| Moth_0677 | UDP-glucose 4-epimerase                                      | 178           | C-terminal fragment                         | 1 paralog   |
| Moth_0680 | UDP-glucose 4-epimerase                                      | 125           | C-terminal fragment                         | 1 paralog   |
| Moth_0682 | conserved hypothetical protein                               | 77            | C-terminal fragment                         | no paralog  |
| Moth_0683 | UDP-glucose 4-epimerase                                      | 113           | C-terminal fragment                         | 1 paralog   |
| Moth_0684 | nucleoside-diphosphate sugar epimerases-like                 | 44            | central region fragment                     | no paralog  |
| Moth_0691 | transposase                                                  | 73            | central region fragment                     | no paralog  |
| Moth_0702 | 5-methylthioribose kinase                                    | 421           | early stop codon                            | no paralog  |
| Moth_0813 | Methyl-viologen-reducing hydrogenase, delta subunit          | 143           | early stop codon                            | 1 paralog   |
| Moth_0939 | conserved hypothetical protein, Patatin                      | 95            | central region fragment                     | 1 paralog   |
| Moth_0954 | RNA polymerase sigma-70 factor, ECF family                   | 179           | N-terminal fragment                         | 2 paralogs  |
| Moth_1008 | permease                                                     | 56            | C-terminal fragment                         | 1 paralog   |
| Moth_1301 | amidohydrolase family protein                                | 454           | frameshift                                  | 3 paralogs  |
| Moth_1429 | hypothetical                                                 | 104           | central region fragment                     | no paralog  |
| Moth_1433 | Ferrous iron transport protein B                             | 682           | early stop codon                            | 1 paralog   |
| Moth_1445 | Periplasmic solute binding protein                           | 207           | missing N-terminal, may be still functional | no paralog  |
| Moth_1485 | ABC transporter ATPase component                             | 87            | central region fragment                     | 14 paralogs |
| Moth_1566 | conserved hypothetical protein                               | 96            | deletion in central region                  | 1 paralog   |
| Moth_1567 | HEPN protein                                                 | 99            | N-terminal fragment                         | no paralog  |
| Moth_1578 | transposase                                                  | 93            | C-terminal fragment                         | no paralog  |
| Moth_1609 | Transposase-like                                             | 229           | N-terminal fragment                         | 1 paralog   |
| Moth_1611 | transposase for insertion sequence element IS904             | 291           | frameshift                                  | no paralog  |
| Moth_1613 | Transposase                                                  | 411           | frameshift                                  | 3 paralogs  |
| Moth_1618 | Transposase                                                  | 414           | frameshift                                  | 3 paralogs  |
| Moth_1725 | ATPase involved in conjugal                                  | 129           | fragments                                   | 1 paralog   |

|           |                                                                            |     |                                          |            |
|-----------|----------------------------------------------------------------------------|-----|------------------------------------------|------------|
| Moth_1801 | plasmid transfer<br>ISChy2, transposase                                    | 425 | frameshift                               | 3 paralogs |
| Moth_1927 | hypothetical                                                               | 48  | central region fragment                  | no paralog |
| Moth_1932 | hypothetical                                                               | 56  | C-terminal fragment                      | no paralog |
| Moth_1987 | B3/4                                                                       | 132 | C-terminal fragment                      | no paralog |
| Moth_1988 | Binding-protein-dependent<br>transport systems inner membrane<br>component | 136 | C-terminal fragment                      | 1 paralog  |
| Moth_2064 | Transposase, IS4                                                           | 369 | Insertion by Moth_2062<br>Integrase      | 1 paralog  |
| Moth_2076 | cell division protein, rodA/ftsW/<br>spoVE family                          | 250 | C-terminal fragment                      | 2 paralogs |
| Moth_2081 | conserved hypothetical protein                                             | 161 | C-terminal fragment                      | 2 paralogs |
| Moth_2090 | putative cobalt transport system<br>permease protein                       | 154 | C-terminal fragment                      | 1 paralog  |
| Moth_2141 | DNA integration/recombination/<br>inversion protein                        | 372 | early stop codon                         | 1 paralog  |
| Moth_2144 | transposase                                                                | 414 | central region fragment                  | 3 paralogs |
| Moth_2146 | Phage integrase                                                            | 309 | early stop codon                         | 1 paralog  |
| Moth_2221 | transcriptional regulator, ArsR<br>family                                  | 70  | early stop codon,<br>C-terminal fragment | 1 paralog  |
| Moth_2222 | putative efflux protein                                                    | 237 | C-terminal fragment                      | 2 paralogs |
| Moth_2340 | transposase, IS4                                                           | 51  | early stop codon,<br>C-terminal fragment | 1 paralog  |
| Moth_2350 | reverse transcriptase                                                      | 76  | early stop codon,<br>C-terminal fragment | 1 paralog  |
| Moth_2356 | response regulator                                                         | 36  | N-terminal fragment                      | 4 paralogs |
| Moth_2357 | ATP-binding region, ATPase-like                                            | 212 | C-terminal fragment                      | 4 paralogs |
| Moth_2361 | putative UDP-glucose 4-epimerase                                           | 85  | C-terminal fragment                      | 1 paralog  |

**Supplementary Table 2. Parameters for BLAST alignments of some *M. thermoacetica* sequences mentioned in the text with GenBank sequences**

| <i>Moorella</i> gene   | Annotation                                             | Blasted against<br>GenBank ID | Organism                        | e-value               | percent<br>identity | percent<br>similarity |
|------------------------|--------------------------------------------------------|-------------------------------|---------------------------------|-----------------------|---------------------|-----------------------|
| Moth_0037              | GlcD                                                   | 1141712                       | <i>Escherichia coli</i>         | 2.00E-96              | 41                  | 62                    |
| Moth_0038              | GlcD                                                   | 1141712                       | <i>Escherichia coli</i>         | 5.00E-25              | 26                  | 40                    |
| Moth_0038              | GlcE                                                   | 1141713                       | <i>Escherichia coli</i>         | 9.00E-17 <sup>1</sup> | 29                  | 50                    |
| Moth_0039              | GlcF                                                   | 1141714                       | <i>Escherichia coli</i>         | 1.00E-30              | 26                  | 42                    |
| Moth_0439              | HdrC                                                   | 41017086                      | <i>M. marburgensis</i>          | 5.00E-19              | 34                  | 49                    |
| Moth_0440              | HdrB                                                   | 41017087                      | <i>M. marburgensis</i>          | 6.00E-46              | 35                  | 52                    |
| Moth_0441              | HdrA                                                   | 41017088                      | <i>M. marburgensis</i>          | 2.00E-56 <sup>1</sup> | 32                  | 48                    |
| Moth_0441              | HdrA                                                   | 72397227                      | <i>Methanosarcina barkeri</i>   | 3.00E-56 <sup>1</sup> | 36                  | 51                    |
| Moth_0441              | HdrA                                                   | 116698301                     | <i>S. fumaroxidans</i>          | 1.00E-05 <sup>1</sup> | 24                  | 37                    |
| Moth_0723              | MoaD                                                   | 2507065                       | <i>Escherichia coli</i>         | 2.7                   | 30                  | 44                    |
| Moth_0809              | HdrC                                                   | 41017086                      | <i>M. marburgensis</i>          | 5.00E-17 <sup>1</sup> | 33                  | 54                    |
| Moth_0810              | HdrB                                                   | 41017087                      | <i>M. marburgensis</i>          | 2.00E-46              | 31                  | 53                    |
| Moth_0811 <sup>2</sup> | HdrA                                                   | 41017088                      | <i>M. marburgensis</i>          | 1.00E-65              | 58                  | 74                    |
| Moth_0812 <sup>2</sup> | HdrA                                                   | 41017088                      | <i>M. marburgensis</i>          | 3.00E-126             | 49                  | 65                    |
| Moth_0864              | Phosphotransacetylase                                  | 5069455                       | <i>Salmonella enterica pduL</i> | 4.00E-44              | 56                  | 72                    |
| Moth_0977              | NADH dehydrogenase I subunit A                         | 77994891                      | <i>C. hydrogenoformans</i>      | 2.00E-28              | 62                  | 75                    |
| Moth_0977              | NADH dehydrogenase I subunit A                         | 83575804                      | <i>Rhodospirillum rubrum</i>    | 8.00E-17              | 40                  | 67                    |
| Moth_0977              | NADH dehydrogenase I subunit A                         | 72398012                      | <i>Methanosarcina barkeri</i>   | 5.00E-12              | 38                  | 53                    |
| Moth_0978              | NADH dehydrogenase I subunit B                         | 77996073                      | <i>C. hydrogenoformans</i>      | 4.00E-59              | 71                  | 86                    |
| Moth_0978              | NADH dehydrogenase I subunit B                         | 83575805                      | <i>Rhodospirillum rubrum</i>    | 1.00E-43              | 62                  | 80                    |
| Moth_0978              | NADH dehydrogenase I subunit B                         | 1788624                       | <i>Escherichia coli</i>         | 5.00E-43 <sup>1</sup> | 52                  | 74                    |
| Moth_0978              | NADH dehydrogenase I subunit B                         | 72398011                      | <i>Methanosarcina barkeri</i>   | 7.00E-39              | 51                  | 73                    |
| Moth_0979              | NADH (or F420H <sub>2</sub> ) dehydrogenase, subunit C | 77995494                      | <i>C. hydrogenoformans</i>      | 2.00E-22              | 45                  | 69                    |
| Moth_0979              | NADH (or F420H <sub>2</sub> ) dehydrogenase, subunit C | 83575806                      | <i>Rhodospirillum rubrum</i>    | 2.00E-14 <sup>1</sup> | 46                  | 65                    |
| Moth_0979              | NADH (or F420H <sub>2</sub> ) dehydrogenase, subunit C | 145693162                     | <i>Escherichia coli</i>         | 5.00E-14 <sup>1</sup> | 36                  | 52                    |
| Moth_0979              | NADH (or F420H <sub>2</sub> ) dehydrogenase, subunit C | 72398010                      | <i>Methanosarcina barkeri</i>   | 2.00E-13 <sup>1</sup> | 37                  | 61                    |
| Moth_0980              | NADH dehydrogenase I, D subunit                        | 77994811                      | <i>C. hydrogenoformans</i>      | 5.00E-128             | 60                  | 77                    |
| Moth_0980              | NADH dehydrogenase I, D subunit                        | 83575807                      | <i>Rhodospirillum rubrum</i>    | 1.00E-91              | 45                  | 59                    |
| Moth_0980              | NADH dehydrogenase I, D subunit                        | 145693162                     | <i>Escherichia coli</i>         | 8.00E-79 <sup>1</sup> | 39                  | 57                    |
| Moth_0980              | NADH dehydrogenase I, D subunit                        | 72398009                      | <i>Methanosarcina barkeri</i>   | 1.00E-72              | 37                  | 59                    |
| Moth_0981              | NADH dehydrogenase, subunit H                          | 77996987                      | <i>C. hydrogenoformans</i>      | 3.00E-99              | 56                  | 74                    |
| Moth_0981              | NADH dehydrogenase, subunit H                          | 83575811                      | <i>Rhodospirillum rubrum</i>    | 4.00E-65              | 47                  | 65                    |
| Moth_0981              | NADH dehydrogenase, subunit H                          | 1788618                       | <i>Escherichia coli</i>         | 3.00E-65              | 42                  | 63                    |
| Moth_0981              | NADH dehydrogenase, subunit H                          | 72398008                      | <i>Methanosarcina barkeri</i>   | 4.00E-51              | 38                  | 57                    |
| Moth_0982              | NADH dehydrogenase I, subunit I                        | 77995805                      | <i>C. hydrogenoformans</i>      | 2.00E-33              | 50                  | 65                    |

|                        |                                 |           |                                   |                       |    |    |
|------------------------|---------------------------------|-----------|-----------------------------------|-----------------------|----|----|
| Moth_0982              | NADH dehydrogenase I, subunit I | 83575812  | <i>Rhodospirillum rubrum</i>      | 9.00E-15              | 33 | 51 |
| Moth_0982              | NADH dehydrogenase I, subunit I | 1788617   | <i>Escherichia coli</i>           | 1.00E-15 <sup>1</sup> | 36 | 54 |
| Moth_0982              | NADH dehydrogenase I, subunit I | 72398007  | <i>Methanosarcina barkeri</i>     | 4.00E-12              | 38 | 55 |
| Moth_0983              | NADH dehydrogenase I, subunit J | 77995086  | <i>C. hydrogenoformans</i>        | 2.00E-17              | 45 | 65 |
| Moth_0983              | NADH dehydrogenase I, subunit J | 83575813  | <i>Rhodospirillum rubrum</i>      | 4.00E-09              | 38 | 57 |
| Moth_0983              | NADH dehydrogenase I, subunit J | 1788616   | <i>Escherichia coli</i>           | 3.00E-06 <sup>1</sup> | 29 | 49 |
| Moth_0983              | NADH dehydrogenase I, subunit J | 72398006  | <i>Methanosarcina barkeri</i>     | 3.00E-07 <sup>1</sup> | 52 | 73 |
| Moth_0984              | NADH dehydrogenase I, subunit K | 77996742  | <i>C. hydrogenoformans</i>        | 7.00E-19              | 52 | 75 |
| Moth_0984              | NADH dehydrogenase I, subunit K | 83575814  | <i>Rhodospirillum rubrum</i>      | 1.00E-13              | 48 | 70 |
| Moth_0984              | NADH dehydrogenase I, subunit K | 1788615   | <i>Escherichia coli</i>           | 8.00E-09              | 37 | 62 |
| Moth_0984              | NADH dehydrogenase I, subunit K | 72398004  | <i>Methanosarcina barkeri</i>     | 2.00E-12              | 48 | 68 |
| Moth_0985              | NADH dehydrogenase I, subunit L | 77996155  | <i>C. hydrogenoformans</i>        | 2.00E-161             | 55 | 71 |
| Moth_0985              | NADH dehydrogenase I, subunit L | 83575815  | <i>Rhodospirillum rubrum</i>      | 1.00E-107             | 47 | 60 |
| Moth_0985              | NADH dehydrogenase I, subunit L | 397909    | <i>Escherichia coli</i>           | 7.00E-103             | 57 | 41 |
| Moth_0985              | NADH dehydrogenase I, subunit L | 72398003  | <i>Methanosarcina barkeri</i>     | 2.00E-101             | 42 | 57 |
| Moth_0986              | NADH dehydrogenase I, subunit M | 77995931  | <i>C. hydrogenoformans</i>        | 4.00E-136             | 53 | 74 |
| Moth_0986              | NADH dehydrogenase I, subunit M | 83575816  | <i>Rhodospirillum rubrum</i>      | 3.00E-80              | 36 | 58 |
| Moth_0986              | NADH dehydrogenase I, subunit M | 1788613   | <i>Escherichia coli</i>           | 4.00E-60 <sup>1</sup> | 36 | 57 |
| Moth_0986              | NADH dehydrogenase I, subunit M | 72398002  | <i>Methanosarcina barkeri</i>     | 2.00E-66              | 35 | 55 |
| Moth_0987              | NADH dehydrogenase I, subunit M | 77995299  | <i>C. hydrogenoformans</i>        | 1e-122                | 48 | 67 |
| Moth_0987              | NADH dehydrogenase I, subunit M | 83575817  | <i>Rhodospirillum rubrum</i>      | 5.00E-63              | 41 | 63 |
| Moth_0987              | NADH dehydrogenase I, subunit M | 145698289 | <i>Escherichia coli</i>           | 7.00E-53              | 36 | 58 |
| Moth_0987              | NADH dehydrogenase I, subunit M | 72398001  | <i>Methanosarcina barkeri</i>     | 1.00E-66              | 37 | 57 |
| Moth_1181              | Phosphotransacetylase           | 5069455   | <i>Salmonella enterica pduL</i>   | 1.00E-43              | 51 | 73 |
| Moth_1194 <sup>3</sup> | HdrA                            | 41017088  | <i>M. marburgensis</i>            | 2.00E-59              | 42 | 65 |
|                        | HdrA                            | 41017088  | <i>M. marburgensis</i>            | 3.00E-59              | 47 | 64 |
|                        | HdrA                            | 41017088  | <i>M. marburgensis</i>            | 5.00E-47              | 36 | 50 |
|                        | HdrA                            | 41017088  | <i>M. marburgensis</i>            | 3.00E-42              | 51 | 72 |
| Moth_1195              | HdrB                            | 41017087  | <i>M. marburgensis</i>            | 2.00E-34              | 29 | 49 |
| Moth_1196              | HdrC                            | 41017086  | <i>M. marburgensis</i>            | 3.00E-13 <sup>1</sup> | 26 | 44 |
| Moth_1199              | AcsF                            | 6226573   | <i>Rhodospirillum rubrum cooC</i> | 2.00E-09              | 27 | 45 |
| Moth_1204              | CooC                            | 6226573   | <i>Rhodospirillum rubrum cooC</i> | 3.00E-45              | 44 | 60 |
| Moth_1278              | TatA                            | 57013123  | <i>Bacillus subtilis</i>          | 7.00E-10 <sup>1</sup> | 53 | 70 |
| Moth_1279              | TatC                            | 2811036   | <i>Bacillus subtilis</i>          | 5.00E-38              | 36 | 60 |
| Moth_1379              | TorD                            | 471306    | <i>Escherichia coli</i>           | 0.009                 | 23 | 40 |
| Moth_1390              | TorD                            | 471306    | <i>Escherichia coli</i>           | 4.00E-04              | 23 | 38 |
| Moth_1452              | HdrC                            | 41017086  | <i>M. marburgensis</i>            | 4.00E-15 <sup>1</sup> | 29 | 53 |
| Moth_1453 <sup>3</sup> | HdrA                            | 41017088  | <i>M. marburgensis</i>            | 2.00E-44              | 36 | 56 |
|                        | HdrA                            | 41017088  | <i>M. marburgensis</i>            | 3.00E-44              | 32 | 51 |

|           |                               |           |                                      |                        |    |    |
|-----------|-------------------------------|-----------|--------------------------------------|------------------------|----|----|
|           | HdrA                          | 41017088  | <i>M. marburgensis</i>               | 5.00E-33               | 32 | 52 |
|           | HdrA                          | 41017088  | <i>M. marburgensis</i>               | 9.00E-17               | 38 | 59 |
| Moth_1599 | DsrD                          | 4028022   | <i>D. thermocisternum</i>            | 3.00E-27               | 73 | 89 |
| Moth_1600 | DsrB                          | 4028021   | <i>D. thermocisternum</i>            | 0                      | 79 | 91 |
| Moth_1601 | DsrA                          | 4028020   | <i>D. thermocisternum</i>            | 0                      | 77 | 90 |
| Moth_1602 | NarI                          | 146921    | <i>Escherichia coli</i>              | 1.00E-03 <sup>1</sup>  | 33 | 45 |
| Moth_1603 | NfrD                          | 404305    | <i>Escherichia coli</i>              | 2.00E-01 <sup>1</sup>  | 19 | 39 |
| Moth_1629 | DsrB                          | 4028021   | <i>D. thermocisternum</i>            | 7.00E-37               | 30 | 48 |
| Moth_1630 | DsrA                          | 4028020   | <i>D. thermocisternum</i>            | 2.00E-40 <sup>1</sup>  | 31 | 48 |
| Moth_1631 | DsrC                          | 2648296   | <i>Archaeoglobus fulgidus</i>        | 5.00E-07 <sup>1</sup>  | 35 | 50 |
| Moth_1632 | DsrC                          | 2648296   | <i>Archaeoglobus fulgidus</i>        | 3.00E-25               | 48 | 70 |
| Moth_1717 | NADH dehydrogenase, subunit G | 145693161 | <i>Escherichia coli</i>              | 3.00E-21 <sup>1</sup>  | 28 | 42 |
| Moth_1718 | NADH dehydrogenase, subunit F | 1788620   | <i>Escherichia coli</i>              | 2.00E-100 <sup>1</sup> | 42 | 65 |
| Moth_1719 | NADH dehydrogenase, subunit E | 1788621   | <i>Escherichia coli</i>              | 2.00E-22               | 35 | 52 |
| Moth_1819 | MobB                          | 1170986   | <i>Escherichia coli</i>              | 1.00E-23               | 38 | 56 |
| Moth_1820 | MoeA                          | 127232    | <i>Escherichia coli</i>              | 1.00E-28 <sup>1</sup>  | 30 | 46 |
| Moth_1822 | ModC                          | 32172422  | <i>Escherichia coli</i>              | 6.00E-31 <sup>1</sup>  | 40 | 56 |
| Moth_1823 | ModB                          | 84028144  | <i>Escherichia coli</i>              | 7.00E-26               | 35 | 55 |
| Moth_1824 | ModA                          | 585493    | <i>Escherichia coli</i>              | 7.00E-23               | 34 | 52 |
| Moth_1826 | L-Lactate dehydrogenase       | 15893559  | <i>Clostridium acetobutylicum</i>    | 1.00E-89               | 49 | 72 |
| Moth_1886 | NADH dehydrogenase, subunit E | 1788621   | <i>Escherichia coli</i>              | 3.00E-28 <sup>1</sup>  | 39 | 54 |
| Moth_1887 | NADH dehydrogenase, subunit F | 1788620   | <i>Escherichia coli</i>              | 5.00E-30               | 28 | 43 |
| Moth_1888 | NADH dehydrogenase, subunit G | 145693161 | <i>Escherichia coli</i>              | 6.00E-01 <sup>1</sup>  | 45 | 63 |
| Moth_1954 | Glyoxylate reductase          | 47116739  | <i>Thermococcus litoralis</i>        | 1.00E-81               | 51 | 69 |
| Moth_1954 | Glyoxylate reductase          | 1049265   | <i>Escherichia coli</i> D-lactate DH | 3.00E-37               | 32 | 48 |
| Moth_1972 | CODH                          | 118663634 | <i>Clostridium cellulolyticum</i>    | 7.00E-133              | 39 | 58 |
| Moth_1972 | CODH                          | 78044052  | <i>C. hydrogenoformans</i> CODH IV   | 9.00E-126              | 39 | 57 |
| Moth_2132 | MogA                          | 84028146  | <i>Escherichia coli</i>              | 4.00E-26               | 36 | 55 |
| Moth_2134 | Moac                          | 67468684  | <i>Escherichia coli</i>              | 2.00E-43               | 55 | 70 |
| Moth_2135 | Moac                          | 266540    | <i>Escherichia coli</i>              | 9.00E-47               | 32 | 50 |
| Moth_2136 | MoeA                          | 127232    | <i>Escherichia coli</i>              | 2.00E-34               | 30 | 48 |
| Moth_2137 | MoeA                          | 127232    | <i>Escherichia coli</i>              | 2.00E-52               | 38 | 51 |
| Moth_2176 | HypE                          | 1789085   | <i>Escherichia coli</i>              | 4.00E-77               | 46 | 63 |
| Moth_2177 | HypD                          | 1789084   | <i>Escherichia coli</i>              | 2.00E-83               | 43 | 59 |
| Moth_2178 | HypC                          | 1789083   | <i>Escherichia coli</i>              | 1.00E-06               | 32 | 53 |
| Moth_2179 | HypF                          | 2367152   | <i>Escherichia coli</i>              | 3.00E-131              | 40 | 54 |
| Moth_2180 | HypB                          | 1789082   | <i>Escherichia coli</i>              | 2.00E-51               | 48 | 63 |
| Moth_2181 | HypA                          | 1789081   | <i>Escherichia coli</i>              | 5.00E-09               | 30 | 44 |
| Moth_2182 | HycI                          | 1789072   | <i>Escherichia coli</i>              | 5.00E-05               | 25 | 52 |

|                        |                    |          |                                                                  |                       |    |    |
|------------------------|--------------------|----------|------------------------------------------------------------------|-----------------------|----|----|
| Moth_2183              | HycH               | 1789073  | <i>Escherichia coli</i>                                          | 6.00E-29              | 43 | 68 |
| Moth_2184              | Hydrogenase 3 hycG | 77996053 | <i>C. hydrogenoformans</i>                                       | 2.00E-30 <sup>1</sup> | 43 | 65 |
| Moth_2184              | Hydrogenase 3 hycG | 1789074  | <i>Escherichia coli</i> hydrogenase 3                            | 3.00E-69              | 58 | 69 |
| Moth_2184              | Hydrogenase 3 hycG | 1788834  | <i>Escherichia coli</i> hydrogenase 4                            | 6.00E-69              | 52 | 67 |
| Moth_2185              | Hydrogenase 4 hyfH | 77995239 | <i>C. hydrogenoformans</i>                                       | 5.00E-15              | 30 | 44 |
| Moth_2185              | Hydrogenase 4 hyfH | 1789075  | <i>Escherichia coli</i> hydrogenase 3                            | 2.00E-37              | 44 | 59 |
| Moth_2185              | Hydrogenase 4 hyfH | 1788833  | <i>Escherichia coli</i> hydrogenase 4                            | 3.00E-34              | 50 | 66 |
| Moth_2186              | Hydrogenase 3 hycE | 77995986 | <i>C. hydrogenoformans</i>                                       | 5.00E-82 <sup>1</sup> | 42 | 59 |
| Moth_2186              | Hydrogenase 3 hycE | 1789076  | <i>Escherichia coli</i> hydrogenase 3                            | 0                     | 64 | 78 |
| Moth_2186              | Hydrogenase 3 hycE | 1788832  | <i>Escherichia coli</i> hydrogenase 4                            | 0                     | 62 | 76 |
| Moth_2187              | Hydrogenase 4 hyfD | 77996057 | <i>C. hydrogenoformans</i>                                       | 1.00E-34 <sup>1</sup> | 35 | 53 |
| Moth_2187              | Hydrogenase 4 hyfD | 2367154  | <i>Escherichia coli</i> hydrogenase 3                            | 5.00E-13 <sup>1</sup> | 24 | 47 |
| Moth_2187              | Hydrogenase 4 hyfD | 1788829  | <i>Escherichia coli</i> hydrogenase 4                            | 2.00E-150             | 55 | 74 |
| Moth_2188 <sup>4</sup> | Hydrogenase 4 hyfF | 77996057 | <i>C. hydrogenoformans</i>                                       | 5.00E-40              | 31 | 51 |
| Moth_2188              | Hydrogenase 4 hyfF | 2367154  | <i>Escherichia coli</i> hydrogenase 3                            | 2.00E-21 <sup>1</sup> | 28 | 47 |
| Moth_2188              | Hydrogenase 4 hyfF | 1788831  | <i>Escherichia coli</i> hydrogenase 4                            | 1.00E-144             | 54 | 72 |
| Moth_2189              | Hydrogenase 4 hyfE | 1788830  | <i>Escherichia coli</i> hydrogenase 4                            | 4.00E-49              | 46 | 67 |
| Moth_2190              | Hydrogenase 4 hyfC | 77996815 | <i>C. hydrogenoformans</i>                                       | 4.00E-24 <sup>1</sup> | 36 | 53 |
| Moth_2190              | Hydrogenase 4 hyfC | 1789077  | <i>Escherichia coli</i> hydrogenase 3                            | 3.00E-81              | 50 | 69 |
| Moth_2190              | Hydrogenase 4 hyfC | 87082115 | <i>Escherichia coli</i> hydrogenase 4                            | 1.00E-76              | 51 | 69 |
| Moth_2191 <sup>4</sup> | Hydrogenase 4 hyfB | 77996057 | <i>C. hydrogenoformans</i>                                       | 4.00E-51              | 39 | 58 |
| Moth_2191              | Hydrogenase 4 hyfB | 2367154  | <i>Escherichia coli</i> hydrogenase 3                            | 2.00E-93              | 40 | 57 |
| Moth_2191              | Hydrogenase 4 hyfB | 178882   | <i>Escherichia coli</i> hydrogenase 4                            | 7.00E-164             | 47 | 65 |
| Moth_2192              | Hydrogenase 4 hyfA | 77996906 | <i>C. hydrogenoformans</i>                                       | 4.00E-30              | 39 | 50 |
| Moth_2192              | Hydrogenase 4 hyfA | 1789079  | <i>Escherichia coli</i> hydrogenase 3                            | 3.00E-42              | 45 | 58 |
| Moth_2192              | Hydrogenase 4 hyfA | 87082114 | <i>Escherichia coli</i> hydrogenase 4                            | 4.00E-44              | 49 | 61 |
| Moth_2303              | GlcA               | 2495662  | <i>Escherichia coli</i> glcA                                     | 3.00E-163             | 54 | 72 |
| Moth_2303              | GlcA               | 462489   | <i>Escherichia coli</i> L-lactate permease                       | 6.00E-157             | 52 | 71 |
| Moth_2304              | GlcC               | 1141711  | <i>Escherichia coli</i> glcC                                     | 5.00E-23              | 31 | 50 |
| Moth_2304              | GlcC               | 82582240 | <i>Escherichia coli</i> pyruvate dehydrogenase complex repressor | 6.00E-34              | 38 | 59 |
| Moth_2305              | GlcF               | 1141714  | <i>Escherichia coli</i>                                          | 2.00E-20 <sup>1</sup> | 22 | 40 |
| Moth_2307              | GlcF               | 1141714  | <i>Escherichia coli</i>                                          | 3.00E-26              | 25 | 44 |
| Moth_2308              | GlcD               | 1141712  | <i>Escherichia coli</i>                                          | 1.00E-93              | 40 | 59 |

<sup>1</sup> These genes align over less than 80 percent of one or both sequences.

<sup>2</sup> These sequences align with the N- and C-terminal parts of HdrA, as described in the text.

<sup>3</sup> These sequences align in more than one part with two regions of HdrA (roughly amino acids 1-300 and 320-650 of *M. marburgensis* HdrA); the ordering of these chunks of sequence is scrambled in the *M. thermoacetica* sequences, relative to the *M. marburgensis* sequences.

<sup>4</sup> This aligns with the same part of the *C. hydrogenoformans* sequence as Moth\_2187 does.

Abbreviations: *M. marburgensis*: *Methanothermobacter marburgensis*; *S. fumaroxidans*: *Syntrophobacter fumaroxidans*; *C. hydrogenoformans*: *Carboxydothemus hydrogenoformans*; *D. thermocisternum*: *Deulfotomaculum thermocisternum*



**Supplementary Table 3. Genes belonging to alcohol and aldehyde dehydrogenase COGs and pfams.**

| Locus tag     | pfam                    | COG     | Annotation                                 |
|---------------|-------------------------|---------|--------------------------------------------|
| Moth_0464     | pfam00465               | COG0371 | Iron-containing alcohol dehydrogenase      |
| Moth_0426     | pfam00106               | COG1028 | Short-chain dehydrogenase/reductase SDR    |
| Moth_0948     | pfam00106               | COG1028 | 3-oxoacyl-(acyl-carrier-protein) reductase |
| Moth_1258     | pfam00106               | COG1028 | Short-chain SDR                            |
| Moth_0475     | pfam00107               | COG1063 | Alcohol dehydrogenase zinc-containing      |
| Moth_2268     | pfam00107               | COG1063 | Alcohol dehydrogenase zinc-containing      |
| Moth_1024     | pfam00465               | COG1454 | Iron-containing alcohol dehydrogenase      |
| Moth_1911     | pfam00465               | COG1454 | Iron-containing alcohol dehydrogenase      |
| Moth_1776     | pfam02396               | COG4569 | Semialdehyde dehydrogenase, -binding       |
| NAD Moth_0154 |                         |         |                                            |
| Moth_0722     |                         |         |                                            |
| Moth_2300     | pfam02730 and pfam01314 | COG2414 | Aldehyde:ferredoxin oxidoreductase         |

**Supplementary Table 4. Five *M. thermoacetica* gene clusters made up of COGs found in pyruvate:ferredoxin oxidoreductase.**

| Locus Tag | Annotation                                                              | COG                           |
|-----------|-------------------------------------------------------------------------|-------------------------------|
| Moth_0033 | Pyruvate ferredoxin oxidoreductase alpha subunit-like                   | COG0674                       |
| Moth_0034 | 2-oxoglutarate synthase                                                 | COG1013                       |
| Moth_0035 | pyruvate:ferredoxin oxidoreductase, gamma subunit-like                  | COG1014                       |
| Moth_0064 | Pyruvate:ferredoxin oxidoreductase, three COG fusion                    | COG0674<br>COG1014<br>COG1013 |
| Moth_0376 | pyruvate ferredoxin oxidoreductase, gamma subunit                       | COG1014                       |
| Moth_0377 | pyruvate:ferredoxin oxidoreductase, delta subunit                       | COG1144                       |
| Moth_0378 | pyruvate ferredoxin oxidoreductase, alpha subunit                       | COG0674                       |
| Moth_0379 | ketoisovalerate ferredoxin oxidoreductase, beta subunit                 | COG1013                       |
| Moth_0934 | pyruvate ferredoxin oxidoreductase, gamma subunit                       | COG1014                       |
| Moth_1591 | pyruvate ferredoxin oxidoreductase, beta subunit                        | COG1013                       |
| Moth_1592 | pyruvate ferredoxin oxidoreductase, alpha subunit                       | COG0674                       |
| Moth_1593 | pyruvate:ferredoxin oxidoreductase, gamma subunit, delta subunit fusion | COG1014<br>COG1144            |
| Moth_1921 | pyruvate ferredoxin oxidoreductase, beta subunit                        | COG1013                       |
| Moth_1922 | pyruvate ferredoxin oxidoreductase, alpha subunit                       | COG0674                       |
| Moth_1923 | pyruvate:ferredoxin oxidoreductase, delta subunit                       | COG1144                       |
| Moth_1924 | pyruvate ferredoxin oxidoreductase, gamma subunit                       | COG1014                       |
| Moth_1984 | 2-oxoglutarate ferredoxin oxidoreductase, alpha subunit                 | COG0674                       |
| Moth_1985 | 2-oxoglutarate ferredoxin oxidoreductase, beta subunit                  | COG1013                       |
| Moth_1986 | 2-oxoglutarate ferredoxin oxidoreductase, gamma subunit                 | COG1014                       |
| Moth_2276 | pyruvate ferredoxin oxidoreductase, gamma subunit                       | COG1014                       |

**Supplementary Table 5. Dissimilatory sulfite reductase gene cluster.**

| Locus tag | Annotation                                                     | COG     |
|-----------|----------------------------------------------------------------|---------|
| Moth_1599 | DsrD                                                           | no COG  |
| Moth_1600 | Dissimilatory sulfite reductase beta subunit                   | COG2221 |
| Moth_1601 | Dissimilatory sulfite reductase alpha subunit                  | COG2221 |
| Moth_1602 | Similar to <i>E. coli</i> nitrate reductase A $\gamma$ subunit | COG2181 |
| Moth_1603 | Similar to NrfD                                                | COG5557 |
| Moth_1604 | Iron sulfur cluster containing protein                         | COG0437 |
| Moth_1605 | Cytochrome c protein                                           | no COG  |
| Moth_1606 | Iron sulfur oxidoreductase of unknown function                 | COG0247 |
| Moth_1629 | Dissimilatory sulfite reductase subunit                        | COG2221 |
| Moth_1630 | Dissimilatory sulfite reductase subunit                        | COG2221 |
| Moth_1631 | DsrC-like                                                      | COG2920 |
| Moth_1632 | DsrC-like                                                      | COG2920 |

**Supplementary Table 6. COGs with greater representation in the *M. thermoacetica* genome than in genomes of two closely related bacteria.**

| COG, annotation                                                             | <i>M. thermoacetica</i> | <i>T. ethanolicus</i> | <i>T. tengcongensis</i> |
|-----------------------------------------------------------------------------|-------------------------|-----------------------|-------------------------|
| <b>DMSO reductase-type molybdopterin oxidoreductases</b>                    |                         |                       |                         |
| COG0243, Typically cysteine-containing                                      | 6                       | 0                     | 0                       |
| COG3383, Uncharacterized                                                    | 4                       | 0                     | 0                       |
| <b>Xanthine dehydrogenase-type molybdopterin oxidoreductases</b>            |                         |                       |                         |
| COG1529, Molybdopterin binding subunit                                      | 4                       | 0                     | 0                       |
| COG1319, FAD binding subunit                                                | 2                       | 0                     | 0                       |
| COG2080, Fe-S subunit                                                       | 2                       | 0                     | 0                       |
| COG0402, Amidohydrolase                                                     | 5                       | 1                     | 1                       |
| <b>Heterodisulfide reductases</b>                                           |                         |                       |                         |
| COG1148, Subunit A                                                          | 4                       | 1                     | 0                       |
| COG2048, Subunit B                                                          | 3                       | 0                     | 0                       |
| COG1150, Subunit C                                                          | 3                       | 0                     | 0                       |
| COG1908 Similar to archaeal F420 reducing hydrogenases, $\delta$ subunit    | 3                       | 0                     | 0                       |
| <b>Dissimilatory sulfite reductases</b>                                     |                         |                       |                         |
| COG2221, Alpha and beta subunits                                            | 6                       | 1                     | 0                       |
| COG2920, DsrC-like                                                          | 2                       | 0                     | 0                       |
| COG2181, Similar to <i>E. coli</i> nitrite reductase, $\gamma$ subunit      | 2                       | 0                     | 0                       |
| <b>Miscellaneous electron transfer related COGs</b>                         |                         |                       |                         |
| COG0247, Fe-S oxidoreductase                                                | 5                       | 0                     | 0                       |
| COG0277, FAD-linked oxidase                                                 | 3                       | 0                     | 1                       |
| COG1251, NAD(P)H dependent nitrite reductase similar to <i>E. coli</i> nirB | 4                       | 1                     | 0                       |
| COG0437, Ferredoxin                                                         | 8                       | 0                     | 0                       |
| COG2414, Aldehyde ferredoxin oxidoreductase                                 | 3                       | 1                     | 0                       |

**Supplementary Table 7. Transporters encoded in the genome of *M. thermoacetica*.**

| Transporter Classification (TC) Family                                                                  | Number of transport systems | Component proteins <sup>1</sup>                                            |
|---------------------------------------------------------------------------------------------------------|-----------------------------|----------------------------------------------------------------------------|
| <b>I. Channels</b>                                                                                      |                             |                                                                            |
| 1.A.11. The Ammonia Transporter Channel (Amt) Family                                                    | 1                           | [Moth_0192]                                                                |
| 1.A.23. The Small Conductance Mechanosensitive Ion Channel (MscS) Family                                | 1                           | [Moth_0082]                                                                |
| 1.A.30.1. The H <sup>+</sup> - or Na <sup>+</sup> -translocating Bacterial Flagellar Motor (Mot) Family | 3                           | [Moth_0458, Moth_0459]<br>[Moth_0781, Moth_0782]<br>[Moth_1740, Moth_1741] |
| 1.A.35. The CorA Metal Ion Transporter (MIT) Family                                                     | 1                           | [Moth_0267]                                                                |
| <b>Ila. MFS-type permeases</b>                                                                          |                             |                                                                            |
| 2.A.1.1. The Sugar Porter (SP) Family                                                                   | 1                           | [Moth_0632]                                                                |
| 2.A.1.2. The Drug:H <sup>+</sup> Antiporter-1 (12 Spanner) (DHA1) Family                                | 1                           | [Moth_2226]                                                                |
| 2.A.1.3. The Drug:H <sup>+</sup> Antiporter-2 (14 Spanner) (DHA2) Family                                | 3                           | [Moth_0999] [Moth_1211]<br>[Moth_2324]                                     |
| 2.A.1.4. The Organophosphate:Pi Antiporter (OPA) Family                                                 | 1                           | [Moth_2345]                                                                |
| 2.A.1.8. The Nitrate/Nitrite Porter (NNP) Family                                                        | 1                           | [Moth_1315]                                                                |
| 2.A.1.11. The Oxalate:Formate Antiporter (OFA) Family                                                   | 1                           | [Moth_1590]                                                                |
| 2.A.1.14. The Anion:Cation Symporter (ACS) Family                                                       | 1                           | [Moth_0477]                                                                |
| 2.A.1.15. The Aromatic Acid:H <sup>+</sup> Symporter (AAHS) Family                                      | 1                           | [Moth_2413]                                                                |
| 2.A.1.32. The Putative Aromatic Compound/Drug Exporter (ACDE) Family                                    | 1                           | [Moth_0116]                                                                |
| 2.A.1.35. The Fosmidomycin Resistance (Fsr) Family                                                      | 1                           | [Moth_1519]                                                                |
| 2.A.1.36. The Acriflavin-sensitivity (YnfM) Family                                                      | 1                           | [Moth_1860]                                                                |
| 2.A.1.40. The Purine Transporter (AzcA) Family                                                          | 1                           | [Moth_1232]                                                                |
| 2.A.1.45. The 2,4-diacetylphloroglucinol (PHL) Exporter (PHL-E) Family                                  | 1                           | [Moth_1257]                                                                |

|                                                                                             |   |                                                                               |
|---------------------------------------------------------------------------------------------|---|-------------------------------------------------------------------------------|
| Unclassified MFS transporters                                                               | 1 | [Moth_2103]                                                                   |
| <b>IIb. Other permeases</b>                                                                 |   |                                                                               |
| 2.A.3. The Amino Acid-Polyamine-Organocation (APC) Family                                   | 6 | [Moth_0156] [Moth_0737]<br>[Moth_1345] [Moth_1528]<br>[Moth_1920] [Moth_1930] |
| 2.A.3.9. The Spore Germination Protein (SGP) Family                                         | 3 | [Moth_1012] [Moth_1460]<br>[Moth_2041]                                        |
| 2.A.4. The Cation Diffusion Facilitator (CDF) Family                                        | 1 | [Moth_1683]                                                                   |
| 2.A.6.2. The (Largely Gram-negative Bacterial) Hydrophobe/Amphiphile Efflux-1 (HAE1) Family | 1 | [Moth_2369, Moth_2370]                                                        |
| 2.A.6.4. The SecDF (SecDF) Family                                                           | 1 | [Moth_1690, Moth_1691]                                                        |
| 2.A.7.22. The 4 TMS Small Multidrug Resistance-2 (SMR2) Family                              | 1 | [Moth_2476]                                                                   |
| 2.A.7.23. The Putative Tryptophan Efflux (Trp-E) Family                                     | 1 | [Moth_1107]                                                                   |
| 2.A.7.3. The 10 TMS Drug/Metabolite Exporter (DME) Family                                   | 4 | [Moth_1125] [Moth_1215]<br>[Moth_1849] [Moth_2311]                            |
| 2.A.8. The Gluconate:H <sup>+</sup> Symporter (GntP) Family                                 | 2 | [Moth_0728] [Moth_0895]                                                       |
| 2.A.9. The Cytochrome Oxidase Biogenesis (Oxa1) Family                                      | 1 | [Moth_2521]                                                                   |
| 2.A.14. The Lactate Permease (LctP) Family                                                  | 1 | [Moth_2303]                                                                   |
| 2.A.19. The Ca <sup>2+</sup> :Cation Antiporter (CaCA) Family                               | 1 | [Moth_0818]                                                                   |
| 2.A.20. The Inorganic Phosphate Transporter (PiT) Family                                    | 1 | [Moth_1237]                                                                   |
| 2.A.21. The Solute:Sodium Symporter (SSS) Family                                            | 1 | [Moth_2279]                                                                   |
| 2.A.28. The Bile Acid:Na <sup>+</sup> Symporter (BASS) Family                               | 1 | [Moth_0574]                                                                   |
| 2.A.37. The Monovalent Cation:Proton Antiporter-2 (CPA2) Family                             | 1 | [Moth_2065]                                                                   |
| 2.A.38. The K <sup>+</sup> Transporter (Trk) Family                                         | 1 | [Moth_1754, Moth_1755]                                                        |

|                                                                                                                                           |   |                                                                                        |
|-------------------------------------------------------------------------------------------------------------------------------------------|---|----------------------------------------------------------------------------------------|
| 2.A.40. The Nucleobase:Cation Symporter-2 (NCS2) Family                                                                                   | 2 | [Moth_2118] [Moth_2478]                                                                |
| 2.A.44. The Formate-Nitrite Transporter (FNT) Family                                                                                      | 1 | [Moth_2194]                                                                            |
| 2.A.46. The Benzoate:H <sup>+</sup> Symporter (BenE) Family                                                                               | 1 | [Moth_1772]                                                                            |
| 2.A.47. The Divalent Anion:Na <sup>+</sup> Symporter (DASS) Family                                                                        | 2 | [Moth_0383] [Moth_2267]                                                                |
| 2.A.49. The Chloride Carrier/Channel (CIC) Family                                                                                         | 1 | [Moth_1588]                                                                            |
| 2.A.56. The Tripartite ATP-independent Periplasmic Transporter (TRAP-T) Family                                                            | 1 | [Moth_0422, Moth_0423, Moth_0424]                                                      |
| 2.A.58. The Phosphate:Na <sup>+</sup> Symporter (PNaS) Family                                                                             | 1 | [Moth_1817]                                                                            |
| 2.A.59. The Arsenical Resistance-3 (ACR3) Family                                                                                          | 1 | [Moth_2208]                                                                            |
| 2.A.66.1. The Multi Antimicrobial Extrusion (MATE) Family                                                                                 | 1 | [Moth_2080]                                                                            |
| 2.A.66.4. The Mouse Virulence Factor (MVF) Family                                                                                         | 2 | [Moth_0216] [Moth_0997]                                                                |
| 2.A.69. The Auxin Efflux Carrier (AEC) Family                                                                                             | 1 | [Moth_0872]                                                                            |
| 2.A.76. The Resistance to Homoserine/Threonine (RhtB) Family                                                                              | 1 | [Moth_0820]                                                                            |
| 2.A.78. The Branched Chain Amino Acid Exporter (LIV-E) Family                                                                             | 1 | [Moth_1241, Moth_1242]                                                                 |
| 2.A.86. The Autoinducer-2 Exporter (AI-2E) Family (Formerly the PerM Family, TC #9.B.22)                                                  | 1 | [Moth_1647]                                                                            |
| <b>IIIa. ABC-type transporters</b>                                                                                                        |   |                                                                                        |
| 3.A.1.1. The Carbohydrate Uptake Transporter-1 (CUT1) Family                                                                              | 1 | [Moth_1481 (C), Moth_1482 (M), Moth_1483 (M), Moth_1484 (R)]                           |
| 3.A.1.2. The Carbohydrate Uptake (CUT2) Family<br>Moth_0614 (M)<br>Moth_0700 (C+C),<br>[Moth_1950 (M),<br>Moth_1951 (M), Moth_1952 (C+C)] | 4 | [Moth_0612 (R), Transporter-2<br>Moth_0613 (C+C),<br>[Moth_0699 (R),<br>Moth_0701 (M)] |

|                                                                                                                              |   |                                                                                                                                                                                                             |
|------------------------------------------------------------------------------------------------------------------------------|---|-------------------------------------------------------------------------------------------------------------------------------------------------------------------------------------------------------------|
|                                                                                                                              |   | [Moth_2020 (M), Moth_2021 (C+C),<br>Moth_2022 (R)]                                                                                                                                                          |
| 3.A.1.3. The Polar Amino Acid Uptake<br>Transporter (PAAT) Family                                                            | 1 | [Moth_1126 (R), Moth_1127 (M),<br>Moth_1128 (C)]                                                                                                                                                            |
| 3.A.1.4. The Hydrophobic Amino Acid<br>Uptake Transporter (HAAT) Family                                                      | 1 | [Moth_2498 (C), Moth_2499 (C),<br>Moth_2500 (M), Moth_2501 (M),<br>Moth_2502 (R)]                                                                                                                           |
| 3.A.1.6. The Sulfate/Tungstate Uptake<br>Transporter (SulT) Family                                                           | 1 | [Moth_0067 (R), Moth_0068 (M),<br>Moth_0069 (C)]                                                                                                                                                            |
| 3.A.1.7. The Phosphate Uptake<br>Transporter (PhoT) Family                                                                   | 1 | [Moth_0112 (M), Moth_0113 (M),<br>Moth_0114 (C), Moth_0473 (R)]                                                                                                                                             |
| 3.A.1.8. The Molybdate Uptake<br>Transporter (MolT) Family                                                                   | 1 | [Moth_1822 (C), Moth_1823 (M),<br>Moth_1824 (R)]                                                                                                                                                            |
| 3.A.1.12. The Quaternary Amine<br>Uptake Transporter (QAT) Family (Similar<br>to 3.A.1.16 and 3.A.1.17)                      | 1 | [Moth_1685 (R), Moth_1686 (M),<br>Moth_1687 (M), Moth_1688 (C)]                                                                                                                                             |
| 3.A.1.14. The Iron Chelate Uptake<br>Transporter (FeCT) Family (Similar to<br>3.A.1.13 and 3.A.1.15)                         | 2 | [Moth_1422 (R), Moth_1423 (C),<br>Moth_1424 (M)] [Moth_1464 (C),<br>Moth_1465 (M), Moth_1466 (R)]                                                                                                           |
| 3.A.1.15. The Manganese/Zinc/Iron<br>Chelate Uptake Transporter (MZT) Family<br>(Similar to 3.A.1.12, 3.A.1.14 and 3.A.1.16) | 1 | [Moth_0928 (M), Moth_0929 (C),<br>Moth_0930 (R)]                                                                                                                                                            |
| 3.A.1.16. The Nitrate/Nitrite/Cyanate<br>Uptake Transporter (NitT) Family (Similar<br>to 3.A.1.12 and 3.A.1.17)              | 2 | [Moth_0405 (M), Moth_0406 (C)]<br>[Moth_1973 (R), Moth_1974 (M),<br>Moth_1975 (C)]                                                                                                                          |
| 3.A.1.17. The Taurine Uptake<br>Transporter (TauT) Family (Similar to<br>3.A.1.12 and 3.A.1.16)                              | 3 | [Moth_0098 (C), Moth_0099 (M)]<br>[Moth_0466 (M), Moth_0467 (C)]<br>[Moth_1979 (C), Moth_1981 (R),<br>Moth_1982 (M)]                                                                                        |
| 3.A.1.18. The Cobalt Uptake<br>Transporter (CoT) Family                                                                      | 1 | [Moth_1219 (C), Moth_1220 (M),<br>Moth_1221 (R), Moth_1222 (M)]                                                                                                                                             |
| 3.A.1.23. The Nickel/Cobalt Uptake<br>Transporter (NiCoT) Family<br>(M)                                                      | 5 | [Moth_0707 (C+C), [Moth_0708<br>(M)]<br>[Moth_1456 (C+C), Moth_1457<br><br>[Moth_1861 (C), Moth_1862 (M),<br>Moth_1863 (M)] [Moth_2058 (M),<br>Moth_2059 (C+C)] [Moth_2427<br>Moth_2428 (C), Moth_2429 (C)] |
| 3.A.1.102. The Lipooligosaccharide<br>Exporter (LOSE) Family                                                                 | 1 | [Moth_0874 (C), Moth_0875 (M)]                                                                                                                                                                              |
| 3.A.1.105. The Drug Exporter-1                                                                                               | 1 | [Moth_2297 (C), Moth_2298 (M)]                                                                                                                                                                              |



(DrugE1) Family

|                                                                                          |   |                                                                                                                                                                                                            |
|------------------------------------------------------------------------------------------|---|------------------------------------------------------------------------------------------------------------------------------------------------------------------------------------------------------------|
| 3.A.1.122. The Macrolide Exporter (MacB) Family                                          | 1 | [Moth_2353 (M), Moth_2354 (C), Moth_2355 (MFP)]                                                                                                                                                            |
| 3.A.1.129. The CydDC Cysteine Exporter (CydDC-E) Family                                  | 2 | [Moth_2097 (M+C)] [Moth_2098 (M+C)]                                                                                                                                                                        |
| Unclassified ABC-type transporters                                                       | 4 | [Moth_0960 (C), Moth_0961 (M)] [Moth_1171 (M), Moth_1172 (C), Moth_1174 (C)] [Moth_1899 (M), Moth_1900 (C), Moth_1901 (C), Moth_1902 (MFP)] [Moth_2328 (MFP), Moth_2329 (C), Moth_2330 (M), Moth_2331 (M)] |
| Orphan ABC transporter components                                                        | 5 | [Moth_1164 (C)] [Moth_1265 (C)] [Moth_1419 (R)] [Moth_1444 (M)] [Moth_0660 (M)]                                                                                                                            |
| <b>IIIb. Other Active transporters</b>                                                   |   |                                                                                                                                                                                                            |
| 3.A.3. The P-type ATPase (P-ATPase) Superfamily                                          | 3 | [Moth_0887] [Moth_1994] [Moth_2203]                                                                                                                                                                        |
| 3.A.10. The H <sup>+</sup> -translocating Pyrophosphatase (H <sup>+</sup> -PPase) Family | 2 | [Moth_0418] [Moth_1349]                                                                                                                                                                                    |
| IV. Phosphotransferase system                                                            |   |                                                                                                                                                                                                            |
| 4.A.2. The PTS Fructose-Mannitol (Fru) Moth_0015, Family V. Accessory transport proteins | 1 | [Moth_0013, Moth_0014, Moth_0016]                                                                                                                                                                          |
| 8.A.1. The Membrane Fusion Protein (MFP) Family VI. Putative or Unassigned               | 2 | [Moth_2322] [Moth_2323]                                                                                                                                                                                    |
| 9.A.8. The Ferrous Iron Uptake (FeoB) Family                                             | 1 | [Moth_1182] [Moth_1405]                                                                                                                                                                                    |
| 9.B.3. The Putative Bacterial Murein Precursor Exporter (MPE) Family                     | 3 | [Moth_0544] [Moth_0842] [Moth_0910]                                                                                                                                                                        |
| 9.B.10. The 6 TMS Putative MarC Transporter (MarC) Family                                | 1 | [Moth_1933]                                                                                                                                                                                                |
| 9.B.14. The Putative Heme Handling Protein (HHP) Family                                  | 1 | [Moth_2200]                                                                                                                                                                                                |
| 9.B.22. The Putative Thiamin Transporter (PTT) Family                                    | 1 | [Moth_1040]                                                                                                                                                                                                |
| 9.B.26. The PF27 (PF27) Family                                                           | 1 | [Moth_0395]                                                                                                                                                                                                |
| 9.B.27. The YdjX-Z (YdjX-Z) Family                                                       | 1 | [Moth_0719]                                                                                                                                                                                                |
| 9.B.31. The YqiH (YqiH) Family                                                           | 2 | [Moth_1217] [Moth_1321]                                                                                                                                                                                    |
| 9.B.32. The Putative Vectorial Glycosyl                                                  | 2 | [Moth_1831] [Moth_2154]                                                                                                                                                                                    |

Polymerization (VGP) Family

|                                                                               |   |                         |
|-------------------------------------------------------------------------------|---|-------------------------|
| 9.B.53. The Unknown IT-6 (UIT6) Family                                        | 1 | [Moth_0569]             |
| 9.B.56. The Unknown IT-9 (UIT9) Family                                        | 1 | [Moth_2124]             |
| 9.B.59. The Putative Peptide Transporter Carbon Starvation CstA (CstA) Family | 1 | [Moth_1963]             |
| 9.B.63. The 10 TMS Putative Sulfate Exporter (PSE) Family                     | 1 | [Moth_1878]             |
| Unclassified putative transporters                                            | 2 | [Moth_1233] [Moth_2507] |

<sup>1</sup>All proteins that constitute a single transport system are enclosed in square ([ ])brackets. For the ABC-type transporters, C denotes the cytoplasmic ATPase, M is the membrane-spanning integral membrane transporter, R denotes the substrate-binding receptor, and MFP is the membrane fusion protein.

## Supplementary Figure legends

### **Supplementary Figure 1. Circular representations of the genome of *M.***

*thermoacetica* ATCC 39073. The outermost two circles indicate start sites of genes and assigned function (colored by COG categories). Circle 1 consists of forward-strand gene products. Circle 2 consists of reverse-strand gene products. Colors represent the following functional categories: amino acid biosynthesis, cyan; biosynthesis of cofactors, brown; cell envelope, light gray; cellular processes, light blue; central intermediary metabolism, dark salmon; energy metabolism, green; fatty acid and phospholipid metabolism, orange; other categories, salmon; protein fate, dark gray; purines, pyrimidines, nucleosides, and nucleotides, light green; regulatory functions, light salmon; replication, blue; transcription and translation, magenta; transport and binding proteins, yellow; unassigned, black; unknown function, red; Circle 3, RNA genes (tRNAs green, sRNAs red); circle 4, pseudogenes, circle 5, IS elements; circle 6, G+C content; circle 7, GC skew ((G-C/G+C), khaki indicates values >1, purple <1).

**Supplementary Figure 2. Pathway proposed for metabolism of xylose.** Locus tags for genes encoding individual steps are shown.

**Supplementary Figure 3. Pathway proposed for metabolism of glucose and fructose.**

Locus tags for genes encoding individual steps are shown.

**Supplementary Figure 4. Pyruvate from sugar metabolism provides electrons and carbon for acetate synthesis by the Wood-Ljungdahl pathway.**

**Supplementary Figure 5. Tetrahydrofolate synthesis.** *M. thermoacetica* genes which could be involved in synthesis of tetrahydrofolate from guanosine triphosphate and chorismate. The sequences of genes encoding enzymes which catalyze the transformations of 7,8-dihydroneopterin 3'-triphosphate to dihydroneopterin phosphate and dihydroneopterin phosphate to dihydroneopterin are not known.

**Supplementary Figure 6. Synthesis of molybdenum cofactor and bis-molybdopterin guanine dinucleotide cofactor from guanine triphosphate.** No *M. thermoacetica* genes were found with homology to the large subunit of molybdopterin synthase, MoaE.

**Supplementary Figure 7. Components of the bacterial flagellar proteins in *M. thermoacetica*.** The figure was derived from the KEGG web server (Kanehisa et al, 2006; <http://www.genome.jp/kegg/>). The gene IDs that correspond to the labeled flagellar proteins are as follows: FlgB (Moth\_0768), FlgC (Moth\_0769), FlgD (Moth\_0777), FlgE (Moth\_0779), FlgG (Moth\_0764), FlgK (Moth\_0746), FlgL (Moth\_0747), FlgL (Moth\_0760), FlgM (Moth\_0744), FlgN (Moth\_0745), FlhA (Moth\_0790), FlhB (Moth\_0789), FliD (Moth\_0765), FliE (Moth\_0770), FliF (Moth\_0771), FliG (Moth\_0772), FliH (Moth\_0773), FliI (Moth\_0774), FliJ (Moth\_0775), FliK (Moth\_0776), FliM (Moth\_0804), FliN (Moth\_0784), FliO (Moth\_0785), FliP (Moth\_0786), FliQ (Moth\_0787), FliR (Moth\_0788), FliS (Moth\_0766). Genes encoding FlgA, FlhC, FlhD, FliT proteins could not be identified in the *M. thermoacetica* genome. However, additional putative flagellar genes with unknown functions are encoded in the genome, such as Moth\_0780 (FlbD), Moth\_0783 (FliL), Moth\_0791 (FlhF), Moth\_0797 (FlgE-like), Moth\_0798 (FlgE-like).

**Supplementary Figure 1. Circular representations of the genome of *M. thermoacetica* ATCC 39073.**

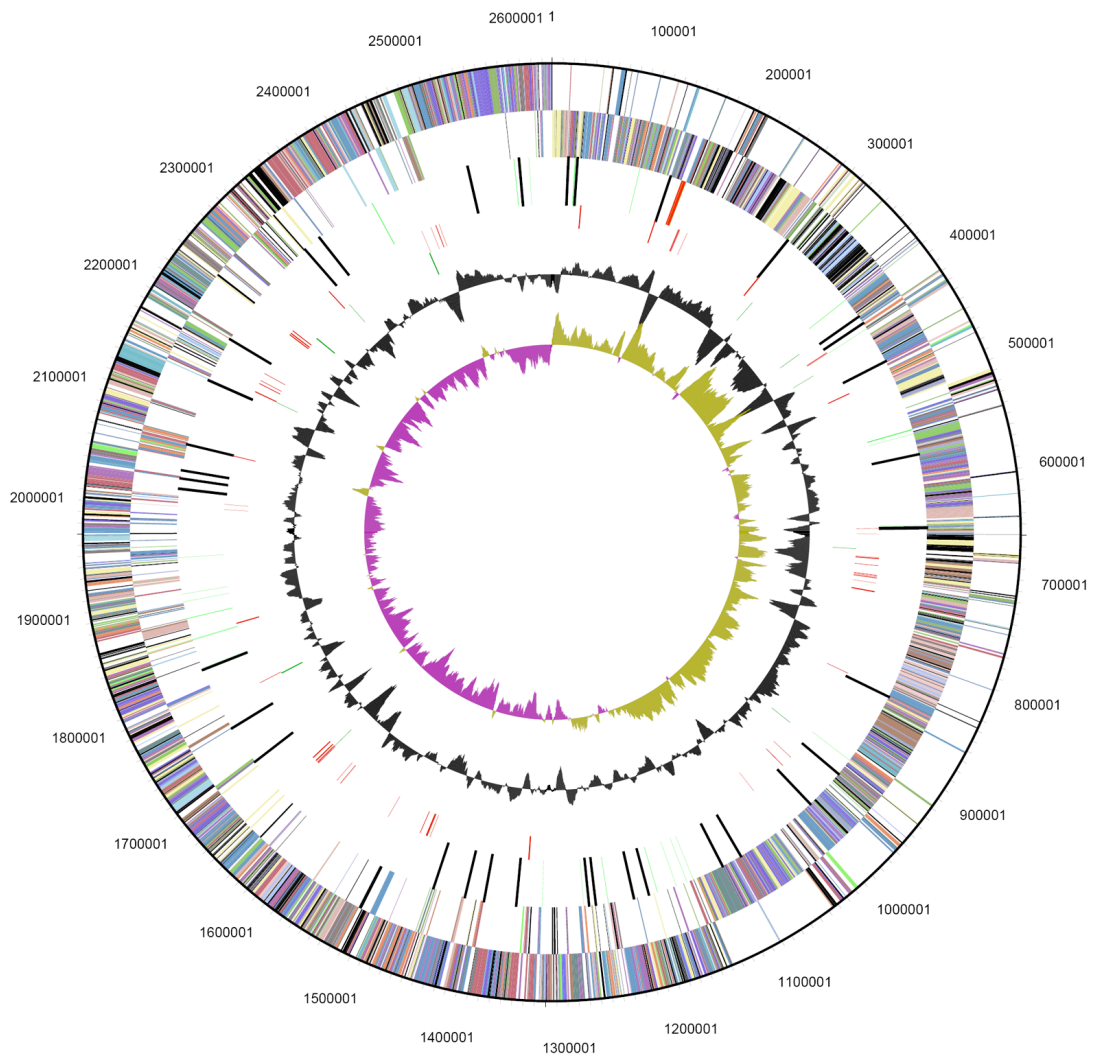

**Supplementary Figure 2. Pathway proposed for metabolism of xylose.**

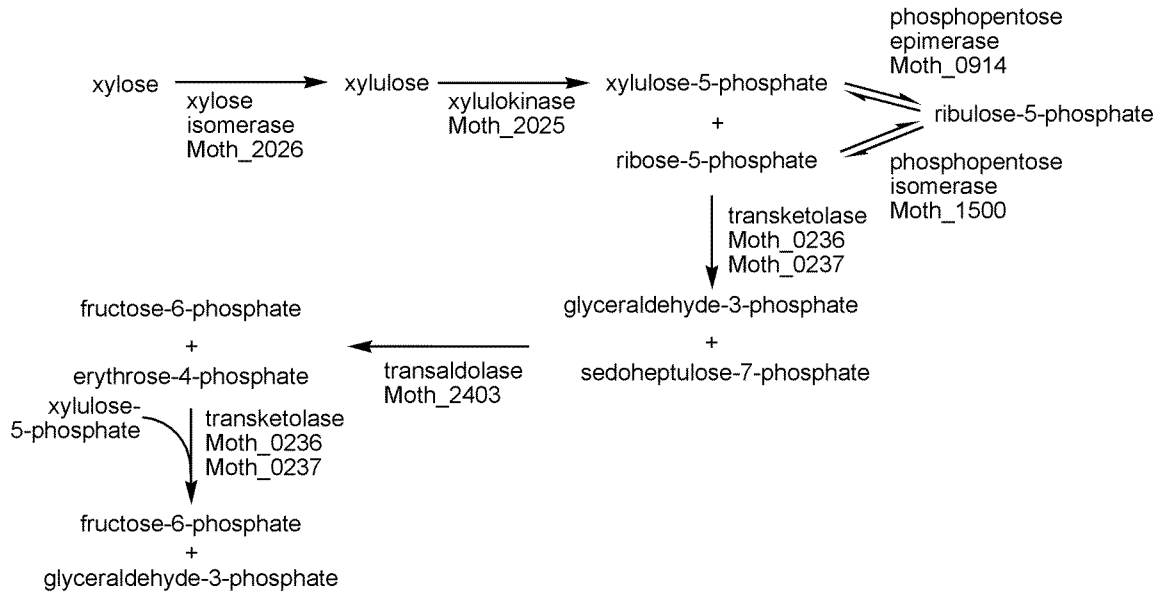

**Supplementary Figure 3. Pathway proposed for metabolism of glucose and fructose.**

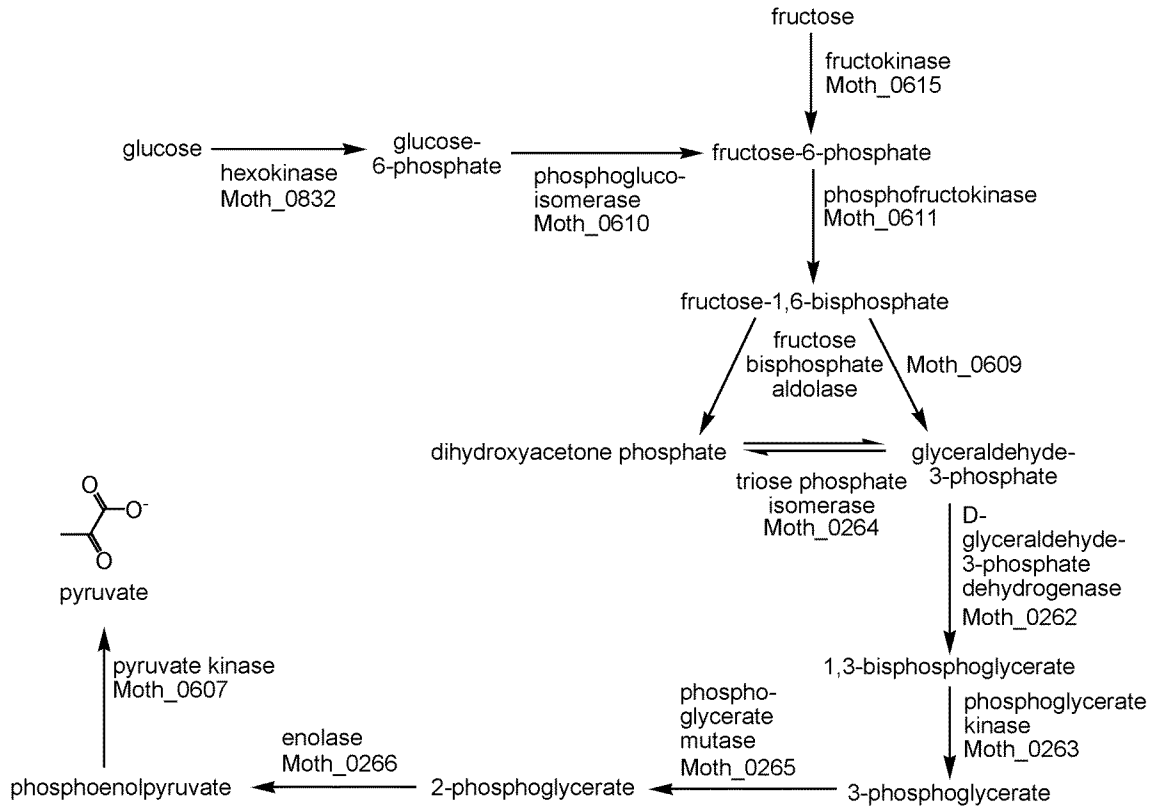

**Supplementary Figure 4. Pyruvate from sugar metabolism provides electrons and carbon for acetate synthesis by the Wood-Ljungdahl pathway.**

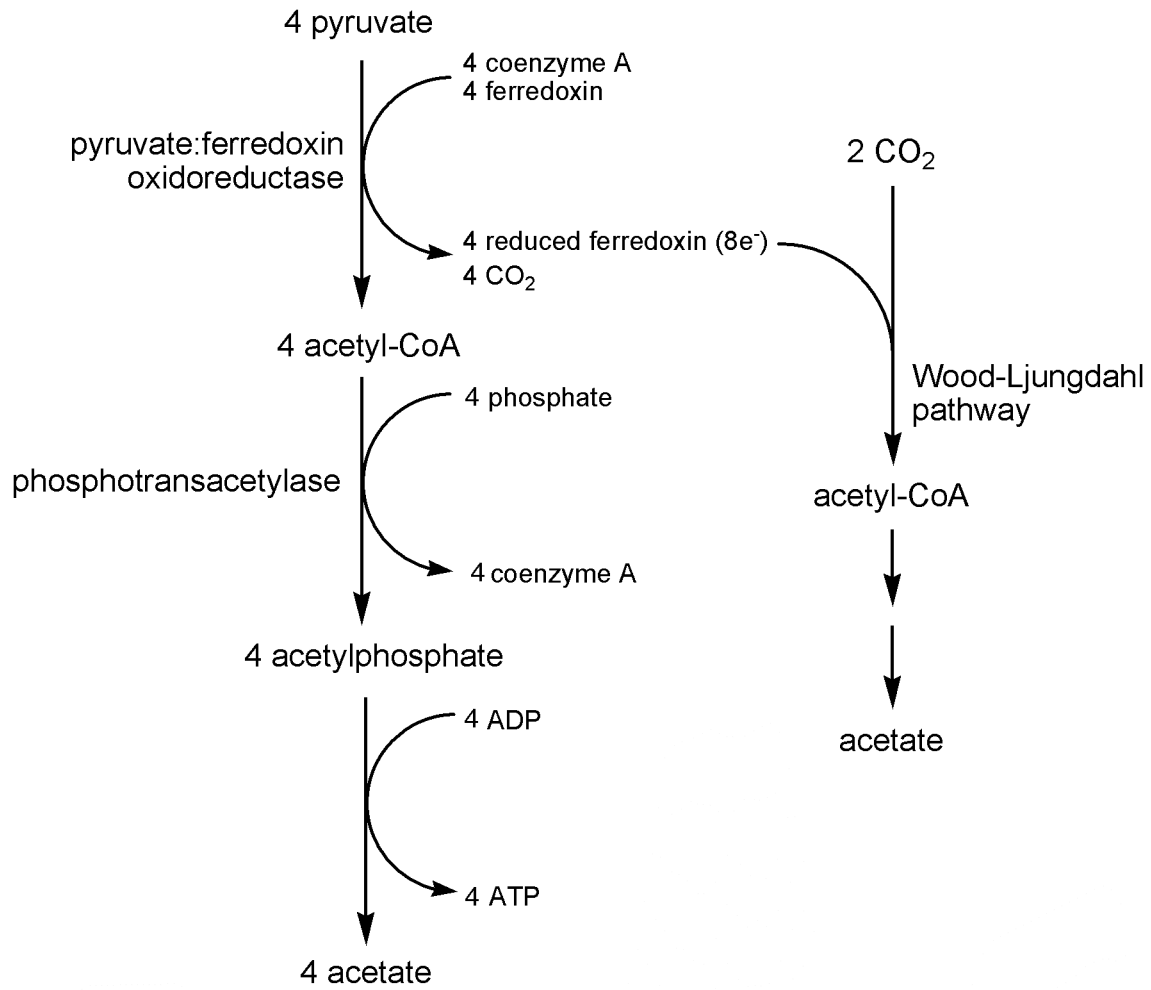



**Supplementary Figure 5. Tetrahydrofolate synthesis.**

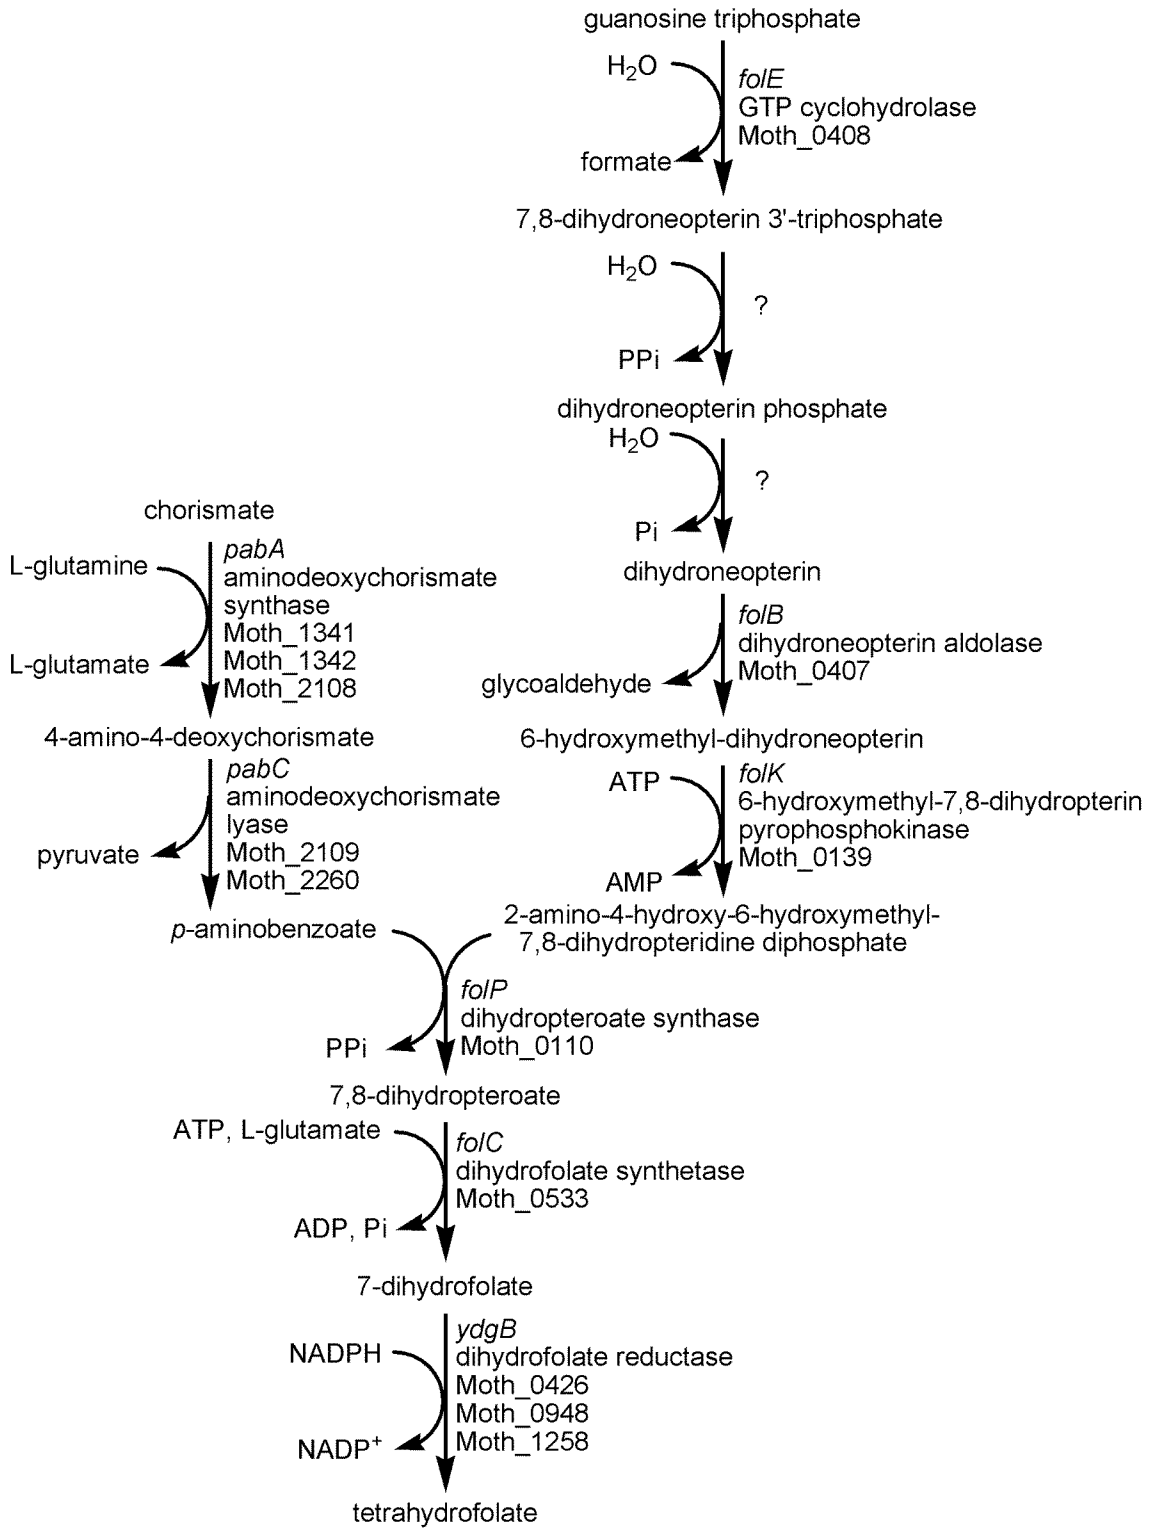

**Supplementary Figure 6. Synthesis of molybdenum cofactor and bis-molybdopterin guanine dinucleotide cofactor from guanine triphosphate.**

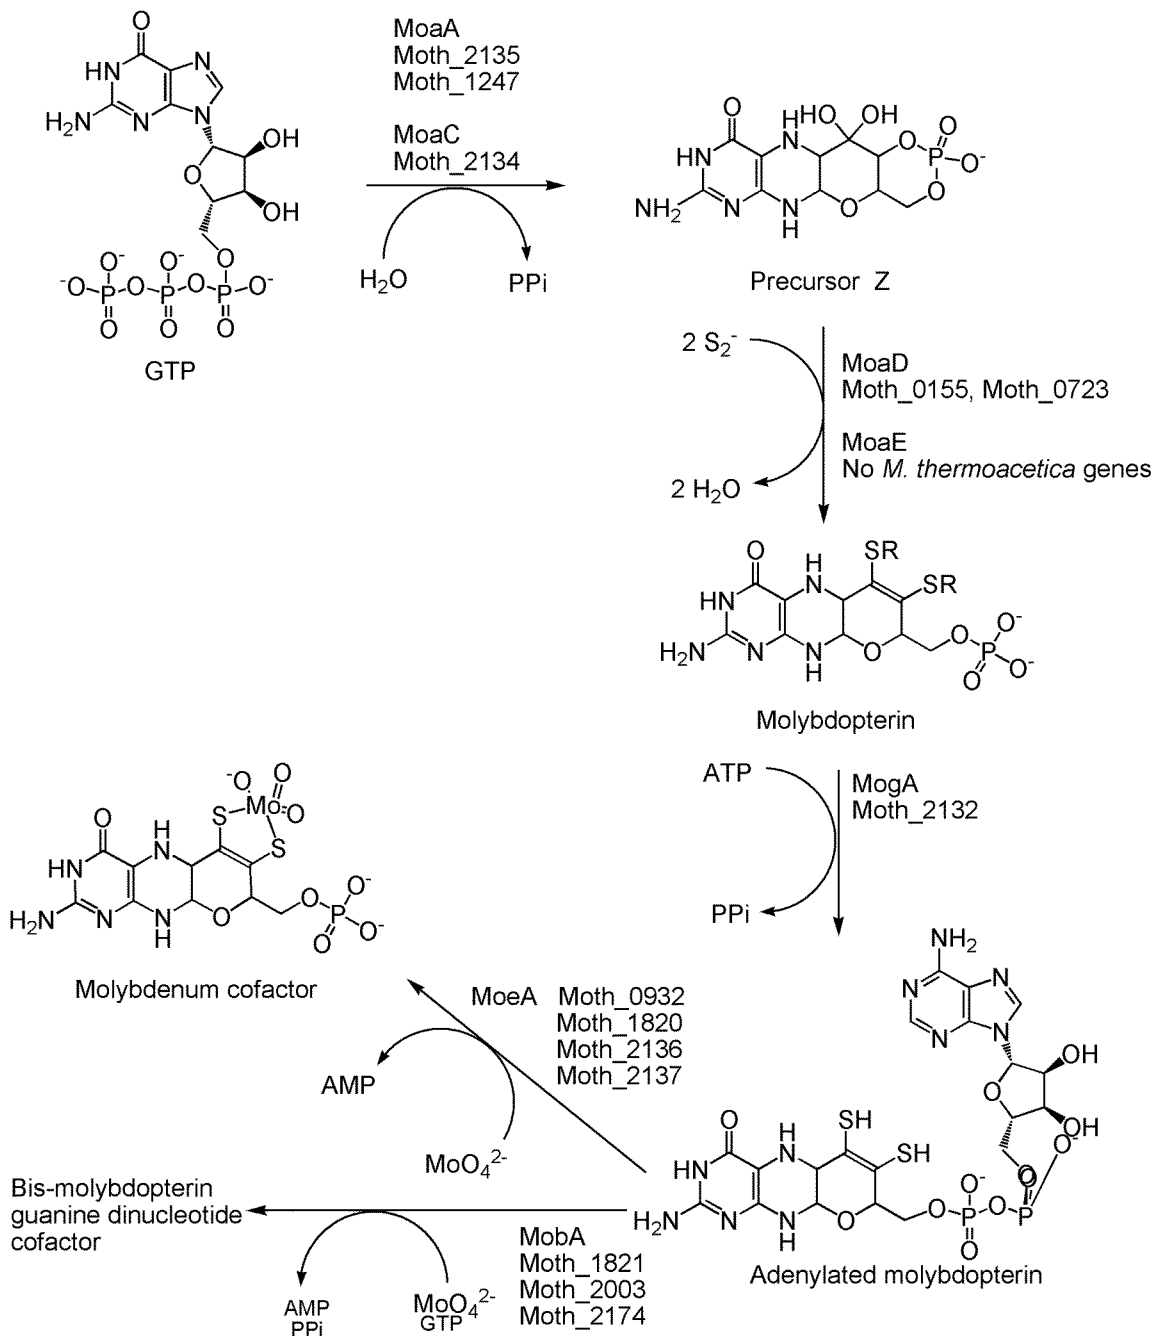

Supplementary Figure 7. Components of the bacterial flagellar proteins in *M. thermoacetica*.

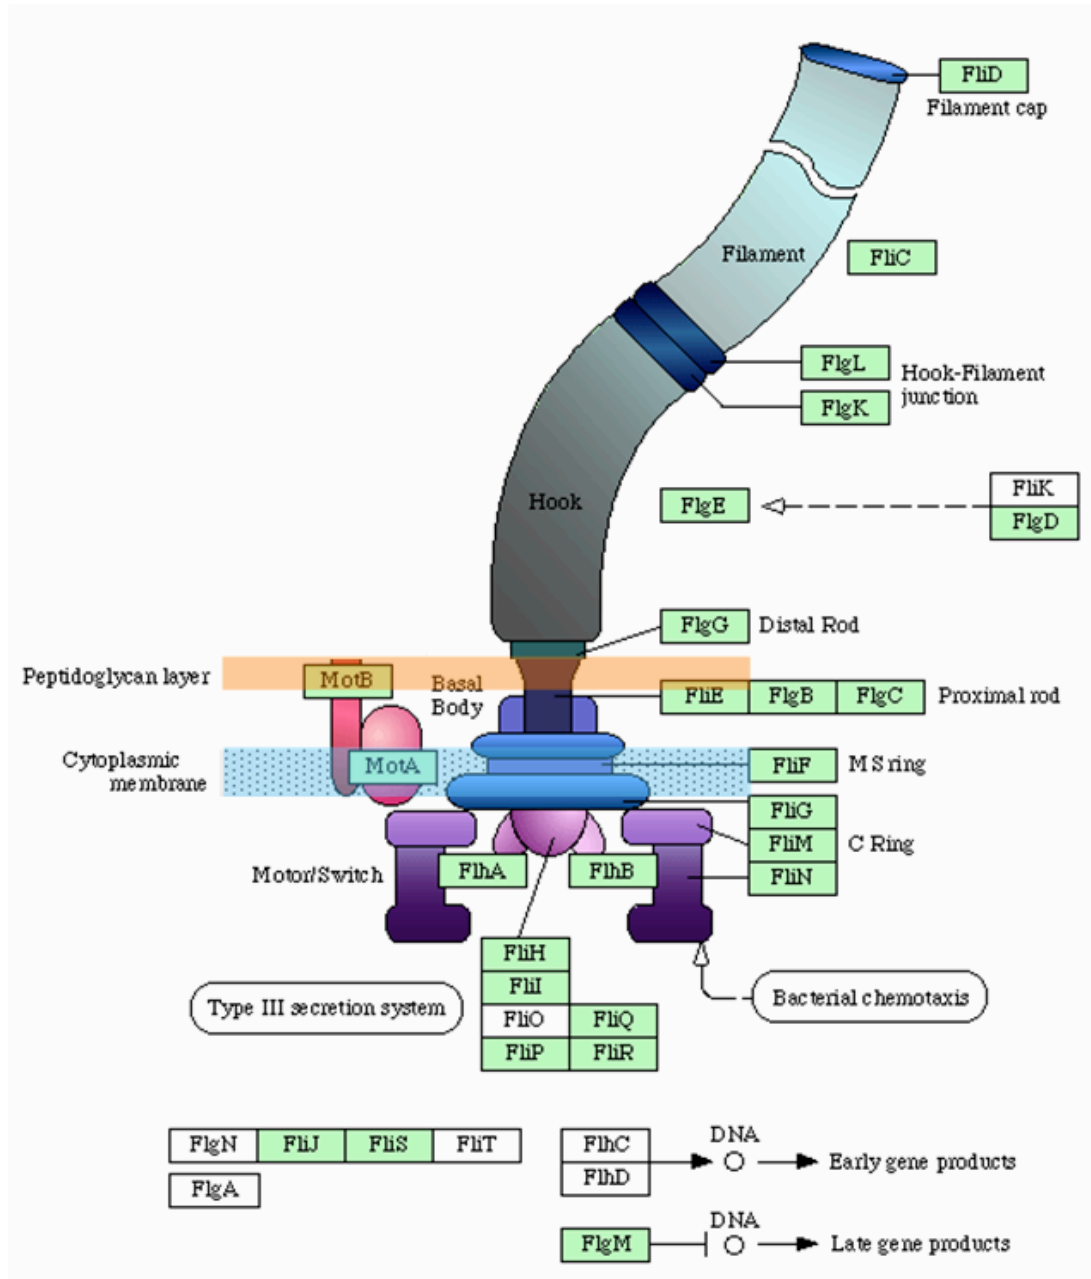

Supplement: NIHMS55802-supplement-Supp_1.pdf [file NIHMS55802-supplement-Supp_1.pdf]
